# Supplementary material
Source: publisher site journal article supplement (https://static.cambridge.org/content/id/urn:cambridge.org:id:article:S1368980020000968/resource/name/S1368980020000968supp002.docx)
Supplement: Supplementary file 1 [file S1368980020000968supp002.docx]

**Supplemental Table 3: Maternal depression and child minimum dietary diversity (MDD) associations, by maternal age**

|  | **Child minimum dietary diversity among younger mother <25 (N=1265)** | | **Child minimum dietary diversity among mother 25 and above**  **(N=1839)** | |
| --- | --- | --- | --- | --- |
| **Unadjusted** | **Adjusted**† | **Unadjusted** | **Adjusted**† |
| **OR (95% CI)** | **OR (95% CI)** | **OR (95% CI)** | **OR (95% CI)** |
| Maternal depression: (PHQ-9 ≥10) | 0.77 (0.43, 1.25) | 0.79 (0.44, 1.40) | 0.82 (0.52, 1.29) | 0.87 (0.54, 1.39) |
| Maternal age | 1.10** (1.03, 1.18) | 1. 12*** (1.05, 1.20) | 0.97* (0.95, 0.99) | 0.99 (0.97, 1.01) |
| Maternal schooling | 1.08*** (1.05, 1.12) | 1.05** (1.02, 1.09) | 1.08*** (1.06, 1.11) | 1.07*** (1.04, 1.10) |
| More than 1 child under 5 years | 0.63*** (0.48, 0.84) | 0.62** (0.47, 0.84) | 0.72** (0.57, 0.91) | 0.73* (0.57, 0.94) |
| Mother as a household head | 0.88 (0.69, 1.14) | 0.86 (0.66, 1.12) | 0.97 (0.81, 1.17) | 0.99 (0.82, 1.19) |
| **Caste/ethnicity** |  |  |  |  |
| Socially excluded | 1.0 (reference) | 1.0 (reference) | 1.0 (reference) | 1.0 (reference) |
| *Brahmin/Chhetri* | 1.49* (1.14, 1.94) | 1.33* (1.02, 1.72) | 1.69*** (1.37, 2.08) | 1.43*** (1.16, 1.77) |
| Others | 0.96 (0.65, 1.43) | 0.91 (0.60, 1.37) | 1.04 (0.74, 1.46) | 1.08 (0.78, 1.48) |
| **Agroecological Zone** |  |  |  |  |
| Mountain | 1.0 (reference) | 1.0 (reference) | 1.0 (reference) | 1.0 (reference) |
| Hill | 1.27 (0.89, 1.80) | 1.18 (0.82, 1.71) | 1.00 (0.72, 1.37) | 0.84 (0.59, 1.20) |
| *Terai* | 0.92 (0.62, 1.38) | 0.71 (0.47, 1.09) | 0.35* (0.46, 0.93) | 0.46*** (0.31, 0.69) |
| **Equity quintile** |  |  |  |  |
| Lowest | 1.0 (reference) | 1.0 (reference) | 1.0 (reference) | 1.0 (reference) |
| 2nd quintile | 0.86 (0.64, 1.18) | 0.87 (0.64, 1.20) | 0.93 (0.73, 1.19) | 0.94 (0.72, 1.22) |
| Middle | 1.11 (0.78, 1.56) | 1.11 (0.77, 1.59) | 1.23 (0.93, 1.62) | 1.19 (0.87, 1.22) |
| 4th quintile | 1.48* (1.03, 2.13) | 1.64* (1.09, 2.47) | 1.07 (0.79, 1.45) | 1.17 (0.82, 1.65) |
| Wealthiest | 1.27 (0.73, 2.22) | 1.29 (0.69, 2.41) | 1.72** (1.15, 2.58) | 1.68* (1.00, 2.81) |

OR, Odd Ratio; CI, Confidence Interval

†adjusted for maternal age, year of schooling, more than one child less than five, mother household head, caste/ethnicity, agro-ecological zone and equity quintile

*p <0.05, **p<0.01, *** p<0.001
